# Supplementary material for: Reliable heatwave attribution based on successful operational weather forecasts
Source: Research Square preprint supplement (doi:10.21203/rs.3.rs-1868647/v1), 2022-08-03
Supplement: Supplementary file 1 [file b2f15c00ecee671559d4063f.pdf]

# Supplementary information for *Reliable heatwave attribution based on successful operational weather forecasts*

Nicholas J. Leach,<sup>1\*</sup> Christopher D. Roberts,<sup>2</sup> Daniel Heathcote,<sup>1,3</sup>  
Dann M. Mitchell,<sup>3</sup> Vikki Thompson,<sup>3</sup> Tim Palmer,<sup>1</sup>  
Antje Weisheimer,<sup>1,2,4</sup> Myles R. Allen,<sup>1,5</sup>

<sup>1</sup>Atmospheric, Oceanic, and Planetary Physics, Department of Physics,  
University of Oxford, Oxford OX1 3PU, UK

<sup>2</sup>Earth System Predictability Section, Research Department,  
European Centre for Medium-Range Weather Forecasts, Reading RG2 9AX, UK

<sup>3</sup>School of Geographical Sciences,  
University of Bristol, Bristol BS8 1SS, UK

<sup>4</sup>National Centre for Atmospheric Science,  
Atmospheric, Oceanic, and Planetary Physics, Department of Physics,  
University of Oxford, Oxford OX1 3PU, UK

<sup>5</sup>Environmental Change Institute, School of Geography and the Environment,  
University of Oxford, Oxford OX1 3QY, UK

\*To whom correspondence should be addressed; E-mail: [nicholas.leach@stx.ox.ac.uk](mailto:nicholas.leach@stx.ox.ac.uk).

## **S1 Methods-supporting figures**

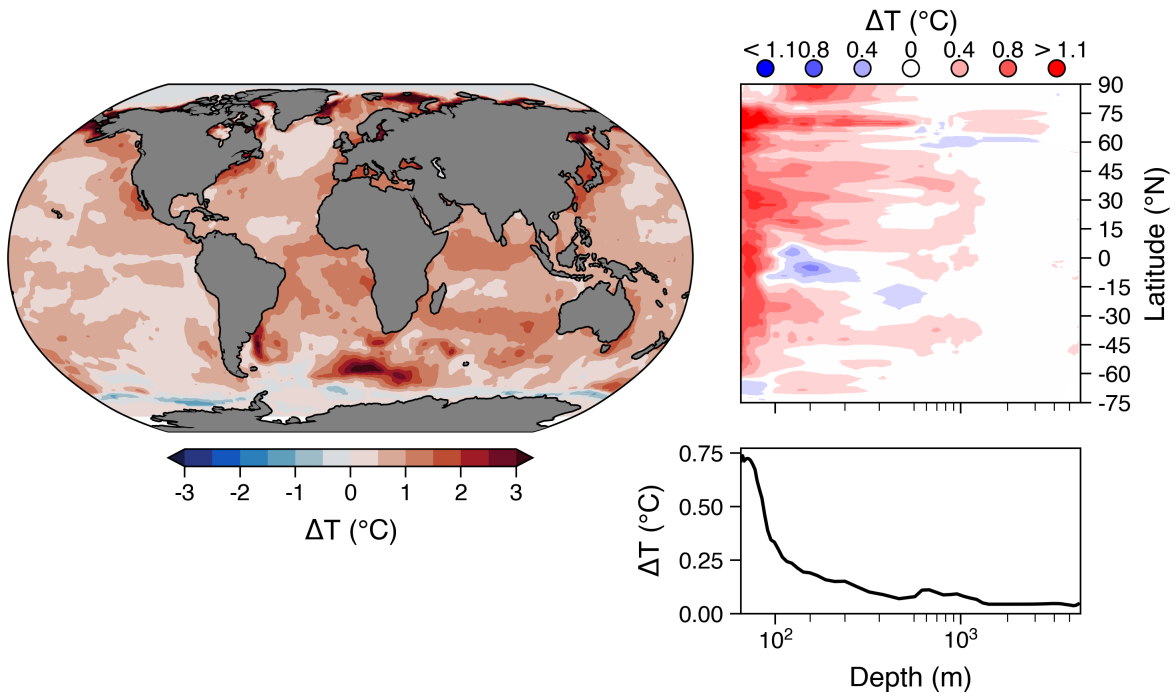

Figure S1: **The initial ocean state perturbation applied.** **Left panel:** map of the surface temperature perturbation. **Inset:** timeseries of annual maximum temperatures for the same dotted region. **Top right panel:** map of zonally averaged temperature perturbations as a function of depth. **Bottom right panel:** globally averaged temperature perturbation as a function of depth. Note that the x-axis switches from a linear to logarithmic scale at a depth of 500m.

## SEAS5 validation

PDF

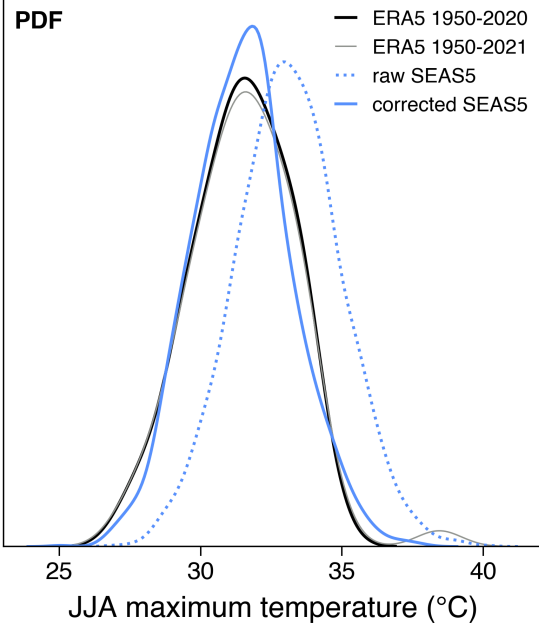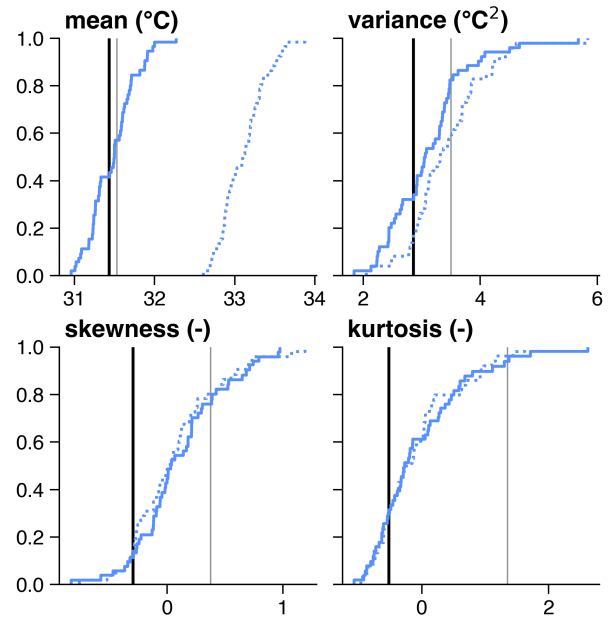

Figure S2: **Validation of the bias correction applied to the SEAS5 seasonal forecast simulations**, following<sup>1</sup> Figure 2.

## <sup>2</sup> **S2 Additional supplementary figures**

**ECMWF forecast initialised 2021-06-26 (3 days)**

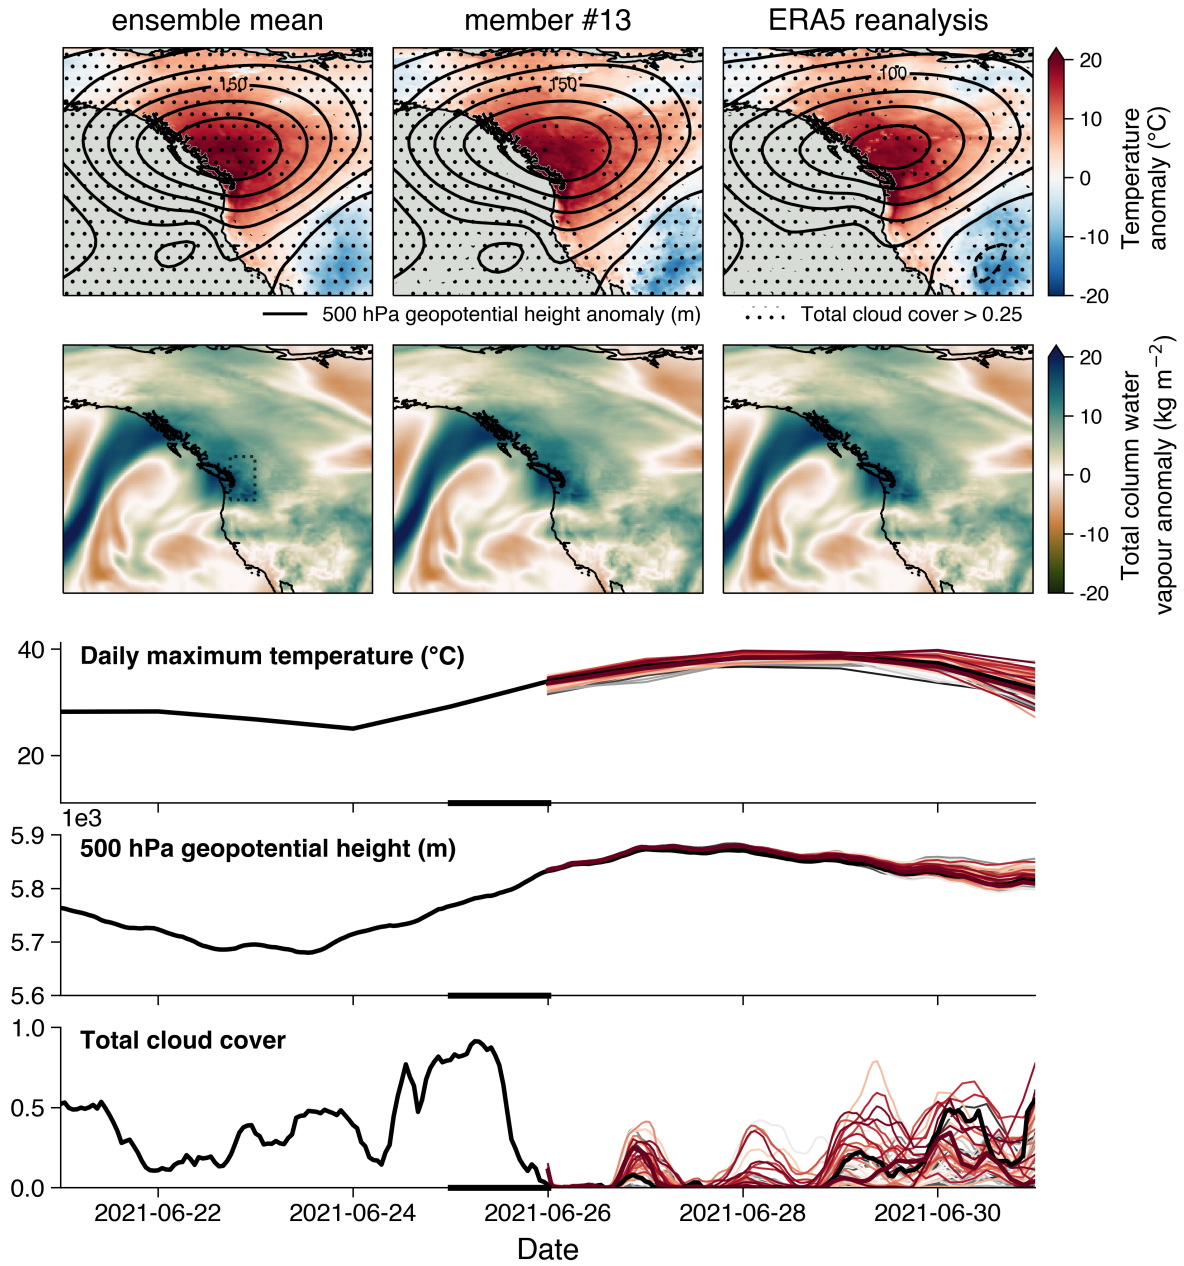

**Figure S3: Drivers of the PNW heatwave and their predictability in the forecast initialised 2021-06-26 (3 days).** As Figure 2, but for the forecast initialised on 2021-06-26.

**ECMWF forecast initialised 2021-06-22 (7 days)**

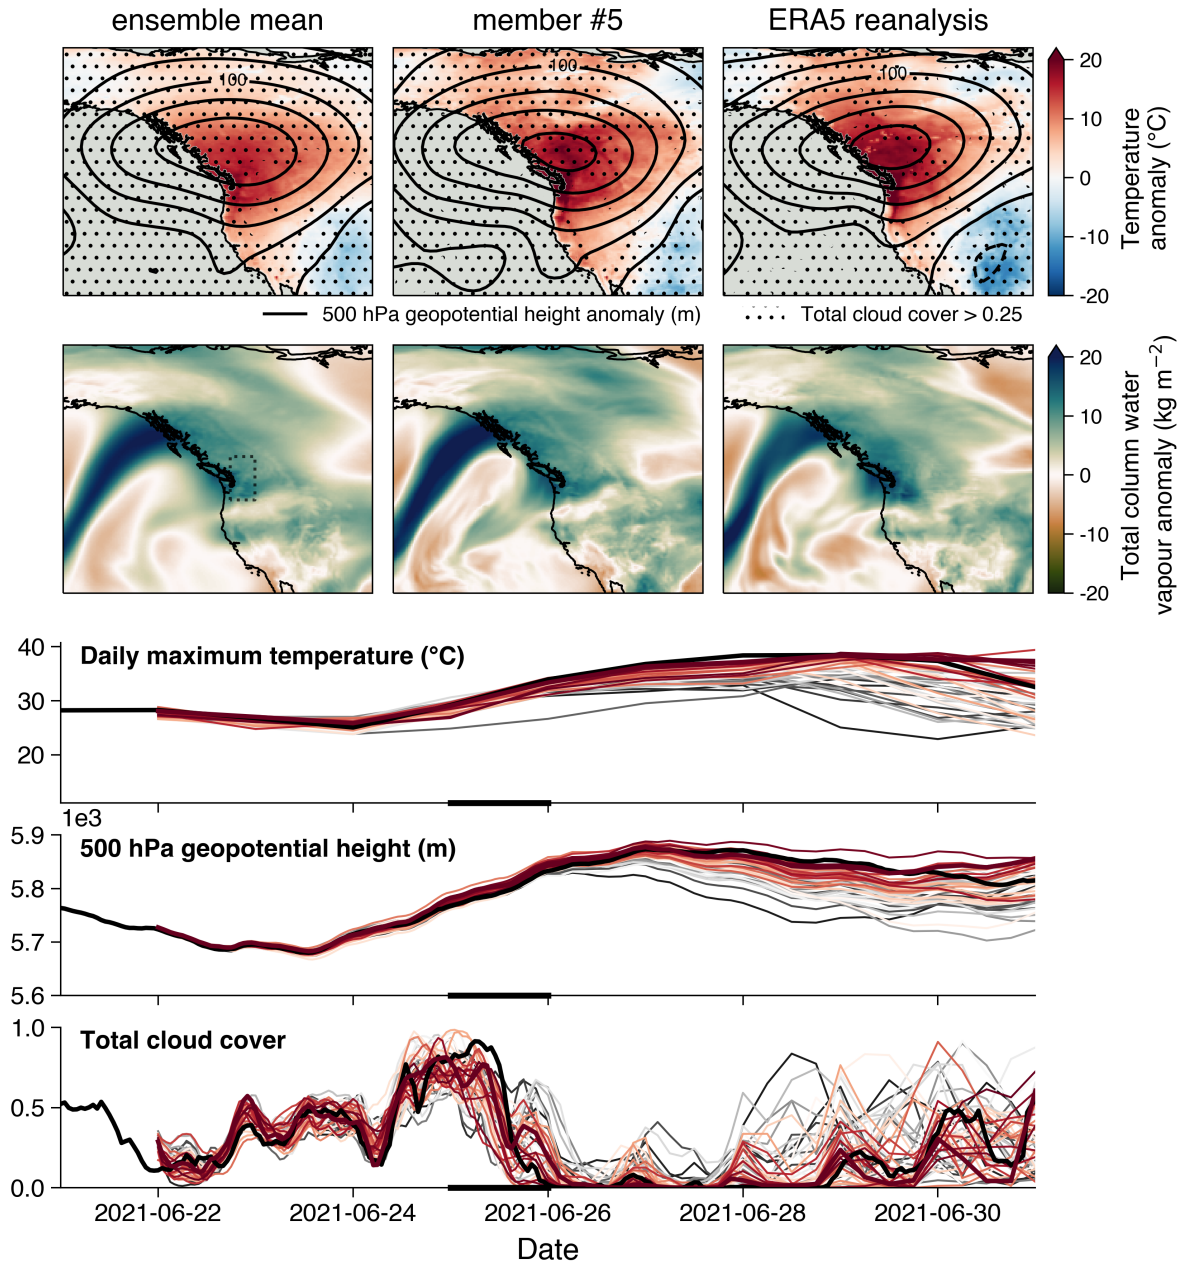

**Figure S4: Drivers of the PNW heatwave and their predictability in the forecast initialised 2021-06-22 (7 days).** As Figure 2, but for the forecast initialised on 2021-06-22.

### ECMWF forecast initialised 2021-05-01 (2-4 months)

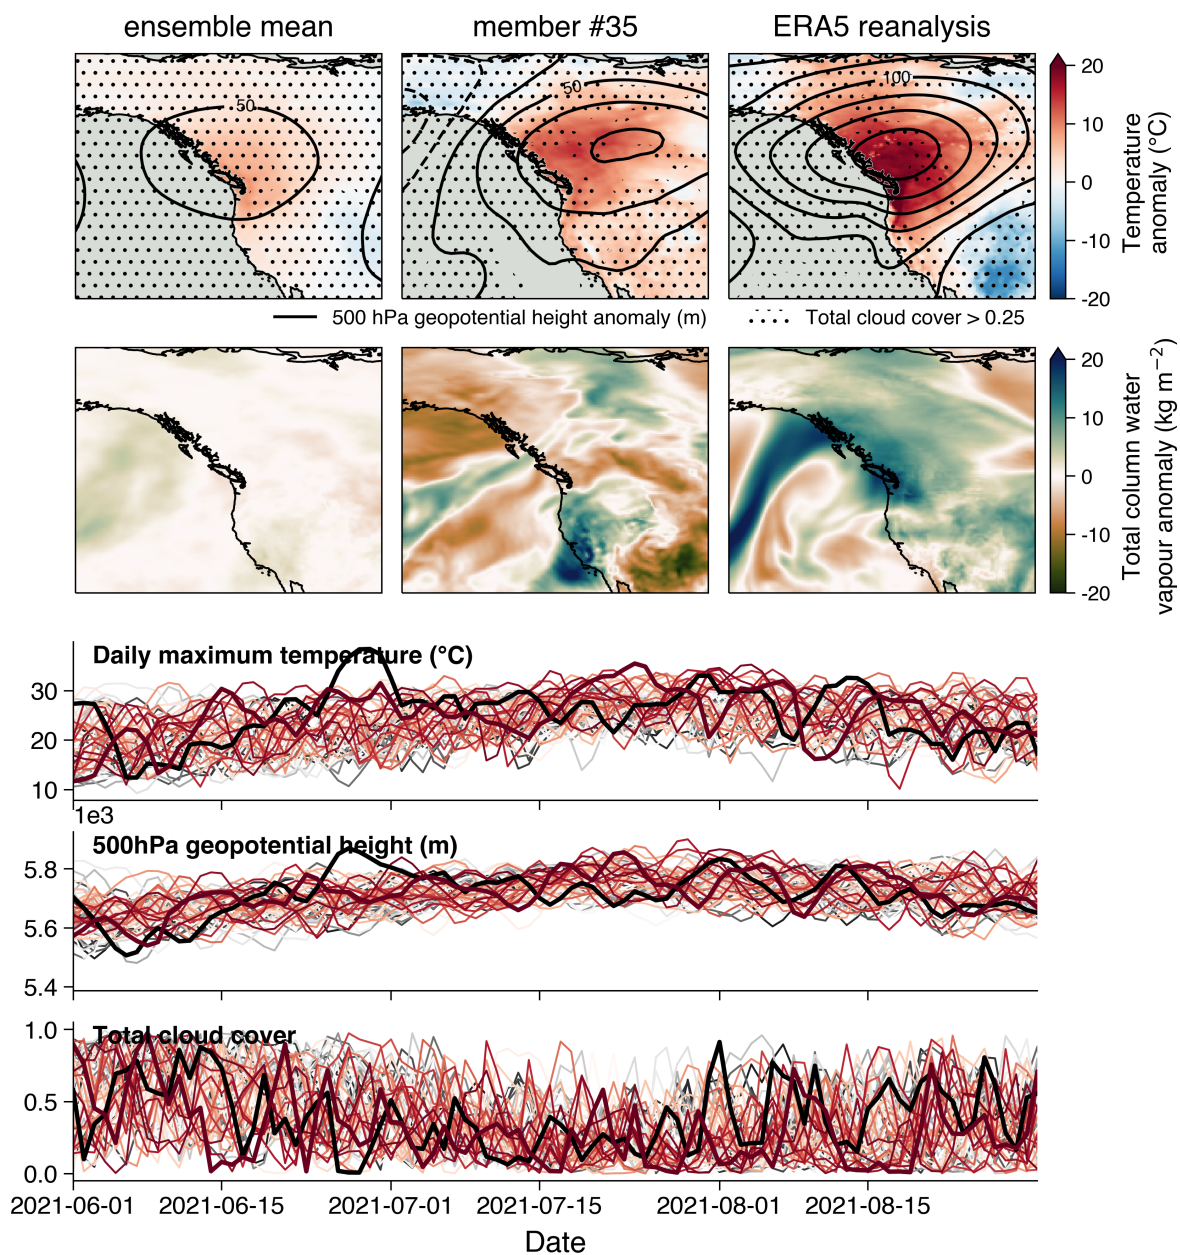

Figure S5: Drivers of the PNW heatwave and their predictability in the forecast initialised 2021-05-01 (2-4 months). As Figure 2, but for the forecast initialised on 2021-05-01.



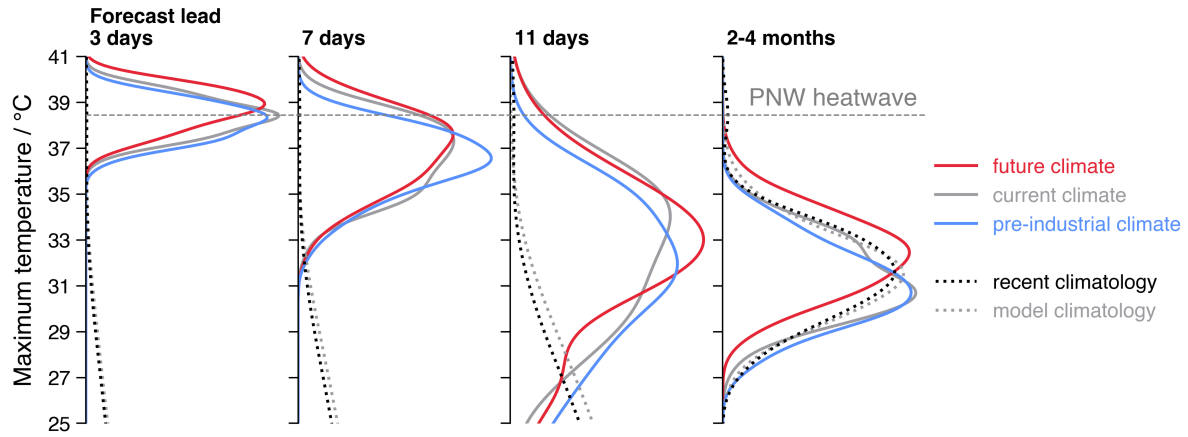

Figure S6: **PDFs of the PNW heatwave in the operational and counterfactual forecast ensembles.** As Figure 3, but showing probability density functions, rather than return-time diagrams.





## 3 **References**

- 4 [1] Thompson, V. *et al.* High risk of unprecedented UK rainfall in the current climate. *Nature*  
5 *Communications* **8**, 1–6 (2017). URL `www.nature.com/naturecommunications`.  
6 Publisher: Nature Publishing Group.
